# Supplementary material for: Awareness of the Risk of Exposure to Infectious Material and the Behaviors of Polish Paramedics with Respect to the Hazards from Blood-Borne Pathogens—A Nationwide Study
Source: Int J Environ Res Public Health. 2017 Jul 27;14(8):843. doi: 10.3390/ijerph14080843 (PMC5580547; doi:10.3390/ijerph14080843)
Supplement: Supplementary file 1 [file ijerph-14-00843-s001.pdf]

***Dear Sir or Madam,***

*In the Department of Hygiene and Epidemiology, Medical University of Lodz, we conduct a study on the exposure of workers to medical infectious material. We believe that given by Mr / Ms answers will contribute to greater interest in occupational health and safety, so that every employee feel comfortable and safe. The information gathered will also help to identify risky behavior committed consciously or unconsciously by the medical staff.*

*Please Mr / Ms to provide honest answers. We ensure that the survey is completely anonymous. The information collected will be developed in the form of aggregated statistics.*

***Thank you for participating in the study.***

## **QUESTIONNAIRE**

**1. Whether in the course of your work, there were situations risky, threatening the safety of you? (during the last two years)**

- |                           |    |                          |
|---------------------------|----|--------------------------|
| a. yes, very often        | 1a | <input type="checkbox"/> |
| b. yes, from time to time | 1b | <input type="checkbox"/> |
| c. very rarely            | 1c | <input type="checkbox"/> |
| d. no, never              | 1d | <input type="checkbox"/> |

**2. What kind of situations they were?**

.....

.....

.....

**3. How often has you in contact with patient's blood, body fluids, secretions or excretions?**

- |                              |    |                          |
|------------------------------|----|--------------------------|
| a. few / several times a day | 3a | <input type="checkbox"/> |
| b. a few times a week        | 3b | <input type="checkbox"/> |
| c. several times a month     | 3c | <input type="checkbox"/> |
| d. several times a year      | 3d | <input type="checkbox"/> |
| e. never                     | 3e | <input type="checkbox"/> |

**4. How often have you used personal protective equipment?**

|                                  | always | often | sometimes | never |
|----------------------------------|--------|-------|-----------|-------|
| protective gloves                |        |       |           |       |
| double pair of protective gloves |        |       |           |       |
| protective mask                  |        |       |           |       |
| protective goggles               |        |       |           |       |
| protective clothing              |        |       |           |       |

**5. What according to you affects the use of protective gloves?**

*(Please select no more than 3 main reasons for non-use of protective gloves)*

- |                                                                                   |    |                          |
|-----------------------------------------------------------------------------------|----|--------------------------|
| a. lack of knowledge about when to use gloves                                     | 5a | <input type="checkbox"/> |
| b. reducing manual dexterity, worse sensing wires, etc.                           | 5b | <input type="checkbox"/> |
| c. contact allergies to latex, skin irritation                                    | 5c | <input type="checkbox"/> |
| d. the hospital does not have cosmetics protecting skin                           | 5d | <input type="checkbox"/> |
| e. lack of time for the establishment of the gloves, too heavy workload           | 5e | <input type="checkbox"/> |
| f. emergency situations                                                           | 5f | <input type="checkbox"/> |
| g. frequent shortages of gloves                                                   | 5g | <input type="checkbox"/> |
| h. lack of proper size gloves                                                     | 5h | <input type="checkbox"/> |
| i. restrictions "of management" for excessive wear gloves                         | 5i | <input type="checkbox"/> |
| j. there is no infections associated with not using gloves (on the hospital unit) | 5j | <input type="checkbox"/> |
| k. others .....                                                                   |    |                          |

**6. Have you ever removed the protective gloves to "easier" perform the operation with the patient?**

- |                                       |    |                          |
|---------------------------------------|----|--------------------------|
| a. yes, very often                    | 6a | <input type="checkbox"/> |
| b. yes, but occasionally              | 6b | <input type="checkbox"/> |
| c. no, never                          | 6c | <input type="checkbox"/> |
| d. I do not use the protective gloves | 6d | <input type="checkbox"/> |

**7. How do you assess yours compliance with the procedures of hygiene (hand washing, donning gloves, etc)?**

- |                                                                           |    |                          |
|---------------------------------------------------------------------------|----|--------------------------|
| a. always I comply with the procedures                                    | 7a | <input type="checkbox"/> |
| b. sometimes I do not comply with the procedures                          | 7b | <input type="checkbox"/> |
| c. quite often I do not comply with the procedures                        | 7c | <input type="checkbox"/> |
| d. very often I do not comply with the procedures                         | 7d | <input type="checkbox"/> |
| e. in the ward where I work, there is no specific, implemented procedures | 7e | <input type="checkbox"/> |

**8. How do you assess the compliance of hygienic procedures by your colleagues?**

- |                             |    |                          |
|-----------------------------|----|--------------------------|
| a. very good/good           | 8a | <input type="checkbox"/> |
| b. acceptably               | 8b | <input type="checkbox"/> |
| c. bad, very bad            | 8c | <input type="checkbox"/> |
| d. I do not care about this | 8d | <input type="checkbox"/> |

**9. When you performed vaccination against hepatitis B?**

- a. a year ago 9a ☐
- b. 2 years ago 9b ☐
- c. 2-5 years ago 9c ☐
- d. more than 5 years ago, but I controlled the level of anti-HBS 9d ☐
- e. more than 5 years ago, and I did not control the level of anti-HBS 9e ☐
- f. I was not vaccinated 9f ☐
- g. I do not remember whether I was vaccinated 9g ☐

**10. Do you feel you performed oral hygiene and vaccination protect workers from possible risks associated with the work?**

- a. yes 10a ☐
- b. no 10b ☐
- c. I do not know 10c ☐

**11. Please indicate how often you have had contact with potentially infectious material (within the last year):**

|                                                   | never | once | several times | dozen times | every day |
|---------------------------------------------------|-------|------|---------------|-------------|-----------|
| through intact skin                               |       |      |               |             |           |
| through non-intact skin                           |       |      |               |             |           |
| transmucosally                                    |       |      |               |             |           |
| by splattering on the mucous membranes of the eye |       |      |               |             |           |

**12. How often you hurt the used needle or worn medical tool?**

- a. every day 12a ☐
- b. a few times a week 12b ☐
- c. several times a month 12c ☐
- d. several times a year 12d ☐
- e. less than a few times a year 12e ☐
- f. I have never hurt 12f ☐

**13. Does your workplace have special containers in which to put sharp instruments?**

- a. yes, they are always available 13a ☐
- b. yes, they are available, but there are not enough 13b ☐
- c. there is no such containers 13c ☐

**14. What are you doing with a used needle? Are you throwing it in a special container or assumes you re-cap?**

- a. always - immediately after use - I put into the container 14a ☐
- b. usually I put into a container, but sometimes I assume cap 14b ☐
- c. always – at first – I assume cap 14c ☐

**15. Are there (at your workplace) different containers / bags for infectious waste and non-infectious??**

- a. yes, they are always available and properly marked 15a ☐
- b. yes, they are available but unmarked 15b ☐
- c. no such containers 15c ☐

**16. Have you ever thrown infectious material, along with other waste to an unmarked container / bag?**

- a. yes, few / several times a day 16a ☐
- b. yes, several times a week 16b ☐
- c. yes, several times a month 16c ☐
- d. yes, several times a year 16d ☐
- e. never 16e ☐

**17. If you answered question 16 "yes", please write why?**

- a. due to the rush 17a ☐
- b. lack of containers 17b ☐
- c. carelessness 17c ☐
- d. other reasons .....

**18. Do you - after cutting, stick injury,- report this to your supervisor or the person responsible for the conduct post-exposure?**

- a. yes, immediately 18a ☐
- b. yes, but only after some time 18b ☐
- c. no, I do not see any threats 18c ☐
- d. not because there is no result from the reports 18d ☐

**19. Do you know a paramedic who has been infected as a result of occupational exposure?**

- a. yes 19a ☐
- b. no 19b ☐
- c. only I've heard of such a person 19c ☐

**20. Are you afraid of infection?**

- a. yes 20a ☐
- b. no 20b ☐
- c. I do not know 20c ☐

**21. Do you keep more careful in dealing with the patient, which is known to be infected with HIV, HBV or HCV?**

- a. yes 21a ☐
- b. no 21b ☐
- c. I do not remember 21c ☐

**22. Have you ever failed to perform actions with the infected patient because you were afraid of infection??**

- a. yes, it happened several times 22a ☐
- b. yes, but only a few times 22b ☐
- c. no, never 22c ☐

**23. Please respond to each statement:**

|                                                                                                                                  | TRUE                     | FALSE                    |
|----------------------------------------------------------------------------------------------------------------------------------|--------------------------|--------------------------|
| Can use of gloves replace disinfection of hands?                                                                                 | <input type="checkbox"/> | <input type="checkbox"/> |
| Is disinfection of hands necessary in emergency situations?                                                                      | <input type="checkbox"/> | <input type="checkbox"/> |
| Do you agree that 60% of HBV infections in Poland is connected with health care?                                                 | <input type="checkbox"/> | <input type="checkbox"/> |
| Is it more likely to become infected with HIV than with HBV as a result of single needlestick injury with a contaminated needle? | <input type="checkbox"/> | <input type="checkbox"/> |
| Is infection with tubercule bacillus possible solely through droplet infection?                                                  | <input type="checkbox"/> | <input type="checkbox"/> |

**24. Do you feel the need to increase your knowledge about the possibility of infection with?**

- a. yes 24a ☐
- b. no 24b ☐
- c. I do not know 24c ☐

**25. Where do you get knowledge about the prevention of infectious diseases?**  
(You can select multiple answers)

- a. knowledge gained during the school / college 25a ☐
- b. knowledge of scientific journals 25b ☐
- c. knowledge of media (television, radio, internet) 25c ☐
- d. knowledge gained at the training courses 25d ☐
- e. other (please specify the source).....

**26. Does your employer provide training on procedures for workers after exposure to the infection ?**

- |                              |     |                          |
|------------------------------|-----|--------------------------|
| a. yes, very often           | 26a | <input type="checkbox"/> |
| b. yes, but too rarely       | 26b | <input type="checkbox"/> |
| c. there is no such training | 26c | <input type="checkbox"/> |
| d. I do not know             | 26d | <input type="checkbox"/> |

**27. When did you participate in the training on proceedings workers after exposure to the infection?**

- |                                           |     |                          |
|-------------------------------------------|-----|--------------------------|
| a. last month                             | 27a | <input type="checkbox"/> |
| b. in the last 6 months                   | 27b | <input type="checkbox"/> |
| c. in the last year                       | 27c | <input type="checkbox"/> |
| d. more than year ago                     | 27d | <input type="checkbox"/> |
| e. over 5 years ago                       | 27e | <input type="checkbox"/> |
| f. I did not participate in such training | 27f | <input type="checkbox"/> |

**Please also Mr / Ms to write some information about yourself:**

**28. Gender:**                F   ☐                M ☐

**29. Age (please give a finite number of years):** .....

**30. Education:**

- |                                                        |     |                          |
|--------------------------------------------------------|-----|--------------------------|
| a. registered paramedic                                | 30a | <input type="checkbox"/> |
| b. licensed paramedic                                  | 30b | <input type="checkbox"/> |
| c. Master of Public Health – Emergency Medicine Expert | 30c | <input type="checkbox"/> |

**31. Number of work posts:**

- |              |     |                          |
|--------------|-----|--------------------------|
| a. 1         | 31a | <input type="checkbox"/> |
| b. 2         | 31b | <input type="checkbox"/> |
| c. 3 or more | 31c | <input type="checkbox"/> |

**32. Work experience (years):**

- |                |     |                          |
|----------------|-----|--------------------------|
| a. < 5 years   | 32a | <input type="checkbox"/> |
| b. 6-15 years  | 32b | <input type="checkbox"/> |
| c. 16-25 years | 32c | <input type="checkbox"/> |
| d. > 25 years  | 32d | <input type="checkbox"/> |

**Thank you for filling in the questionnaire.**
